# Supplementary material
Source: MDPI journal article supplement (https://www.mdpi.com/2073-4344/11/7/802)
Supplement: s1 [file s1]

## **Electronic Supplementary Information**

### **Green and high effective scale inhibitor based on ring-opening graft modification of polyaspartic acid**

Yong-sheng Zhou<sup>1</sup>, Jie Wang<sup>2</sup>, Yan Fang<sup>2\*</sup>

<sup>1</sup>School of Mechanical Engineering, Hefei University of Technology, Hefei 230009, China.

<sup>2</sup>State Key Laboratory of Materials-Oriented Chemical Engineering, College of Biotechnology and Pharmaceutical Engineering, Nanjing Tech University, Nanjing 211816, China.

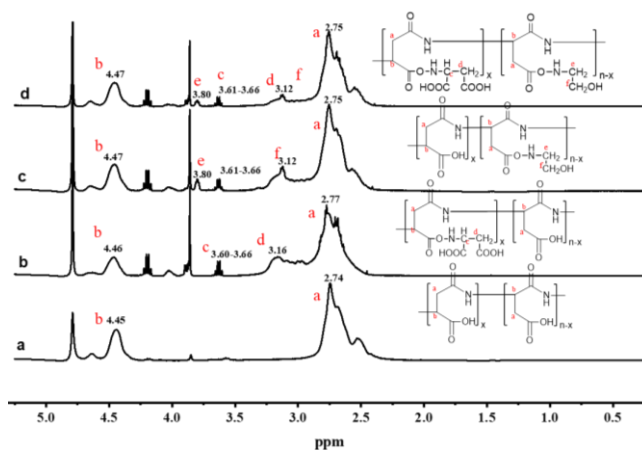

**Figure S1.**  $^1\text{H}$  NMR spectrum of PASP and PASP derivative. a PASP, b PASP-ASP, c PASP-MEA and d PASP-ASP-MEA. (For PASP-ASP-MEA, the molar ratio of PSI: ASP: MEA is 1:0.5:0.5, reaction temperature is  $0^\circ\text{C}$ , reaction time is 24 h)
